# Supplementary material for: Sensitive electrochemical detection of vaccinia virus in a solution containing a high concentration ofl-ascorbic acid
Source: Royal Society of Chemistry journal article supplement (doi:10.1039/c5an01086a), 2015-01-01

## **Electronic Supplementary Information**

### **Sensitive electrochemical detection of vaccinia virus in a solution containing a high concentration of L-ascorbic acid**

Seonhwa Park,<sup>a</sup> Jihye Kim,<sup>b</sup> Hwiseok Ock,<sup>a</sup> Eui-Cheol Shin<sup>b</sup> and Haesik Yang<sup>a</sup>

**Fig. S1** Cyclic voltammograms obtained in PBS containing (i) 1.0 mM AP and (ii) 1.0 mM AP and 100 mM  $\text{KIO}_3$  at rGO/ITO electrode.

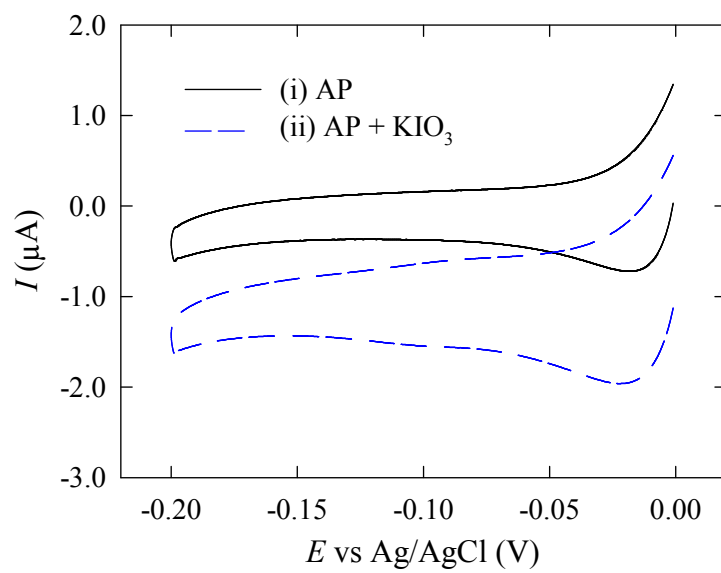

**Fig. S2** (a) Cyclic voltammograms obtained at a scan rate of 20 mV/s (i, ii) after rGO/ITO electrodes modified with avidin and biotinylated antimouse IgG were incubated in PBSB containing 1.0 mM AA for 30 min, the electrodes were washed (ii) twice and (iii) three times with rinsing buffer, and the electrodes were incubated for 10 min in PBS and (iii) after a rGO/ITO electrode modified with avidin and biotinylated antimouse IgG was incubated for 10 min in PBS. (b) Cyclic voltammograms obtained at a scan rate of 20 mV/s in PBS containing 1.0 mM AA, 1.0 mM UA, and 1.0 mM AcP at rGO/ITO electrodes.

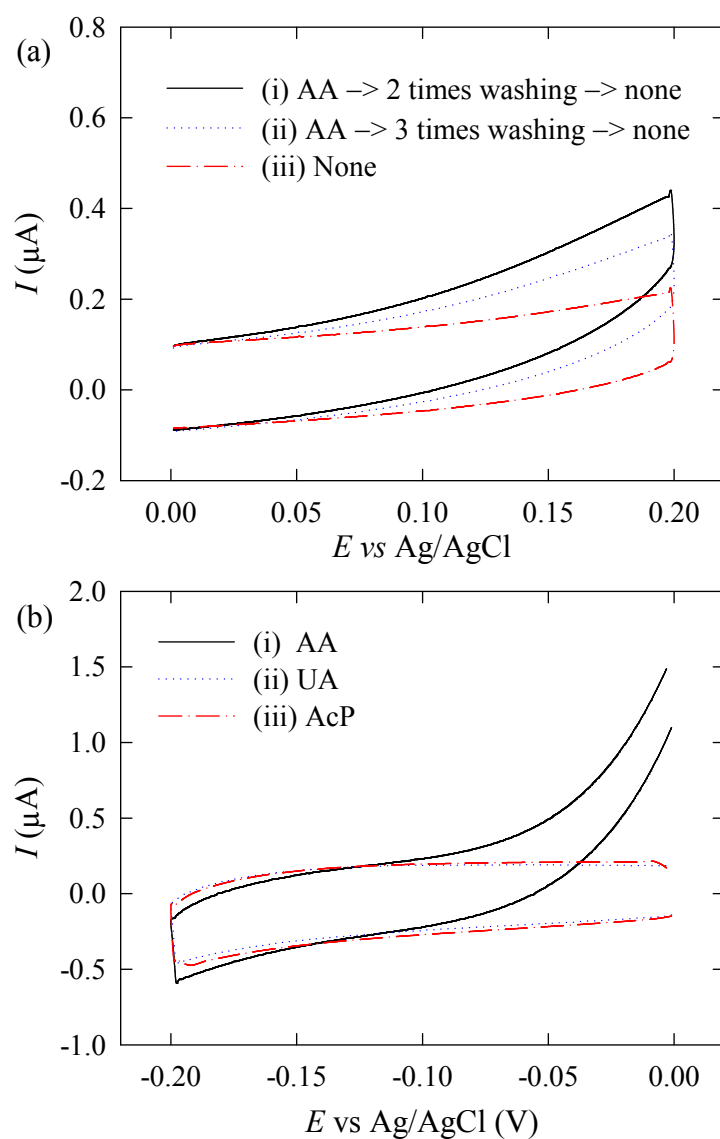

**Fig. S3** Chronocoulougrams obtained at  $-0.20$  V,  $-0.15$  V,  $-0.10$  V, and  $-0.05$  V at rGO/ITO electrodes after an incubation for 10 min at  $25$  °C in PBS containing (a)  $1.0$  mM AP-GP and  $100$  mM  $\text{KIO}_3$  and (b)  $1.0$  mM AP-GP,  $100$  mM  $\text{KIO}_3$ , and  $50$   $\mu\text{g/mL}$  Gal.

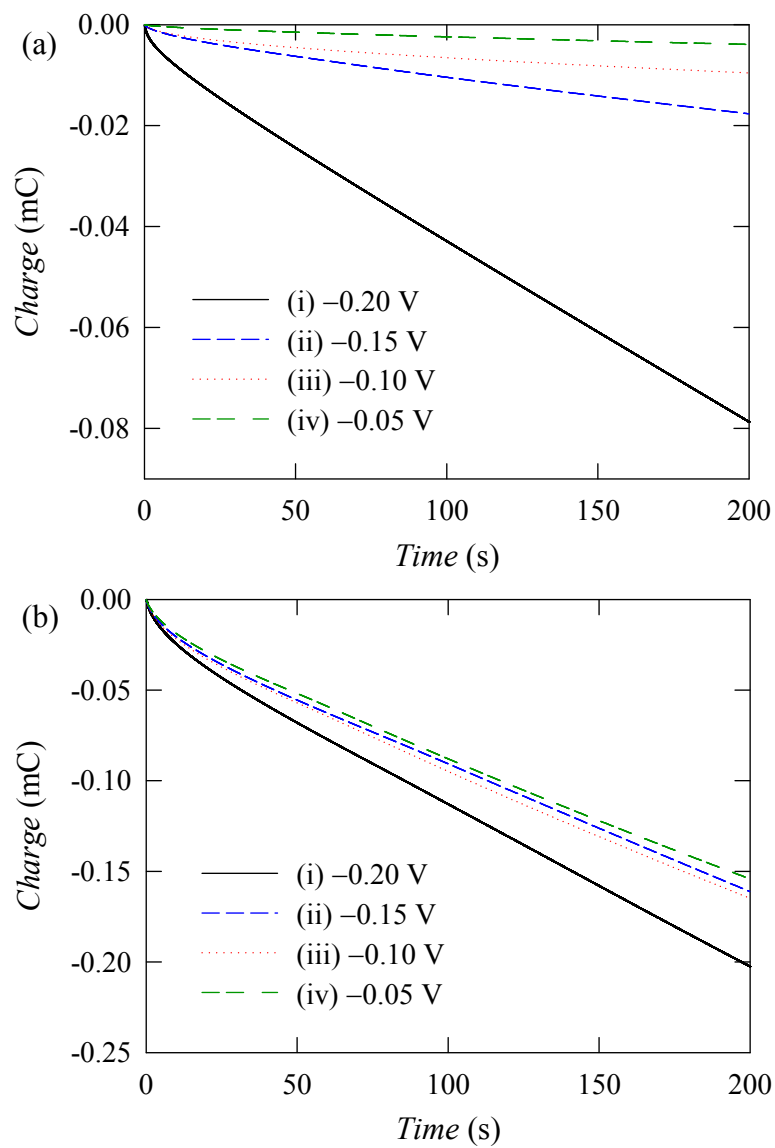

**Fig. S4** Chronocoulograms obtained at  $-0.05$  V at rGO/ITO electrodes for (a) different concentrations of mouse IgG in PBS, (b) different concentrations of VV in PBSB, and (c) different concentrations of VV in 50% mandarin juice after the final immunosensing electrodes were incubated for 10 min in PBS containing 1.0 mM AP-GP and 100 mM  $\text{KIO}_3$ .

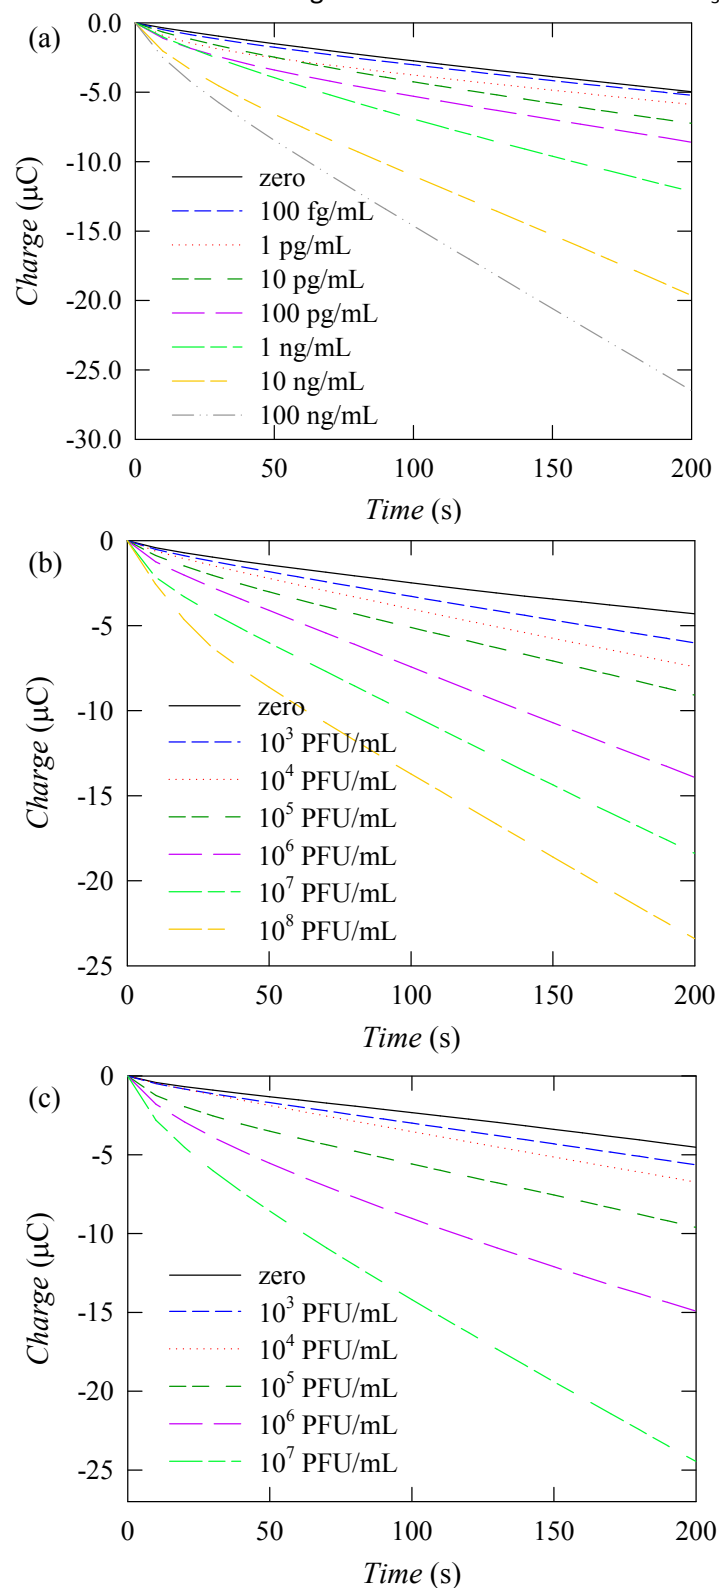

**Fig. S5** Scanning electron microscopic images of (a) a bare ITO electrode, (b) a rGO/ITO electrode, and (c) an immunosensing electrode obtained after treating  $10^5$  PFU/mL VV.

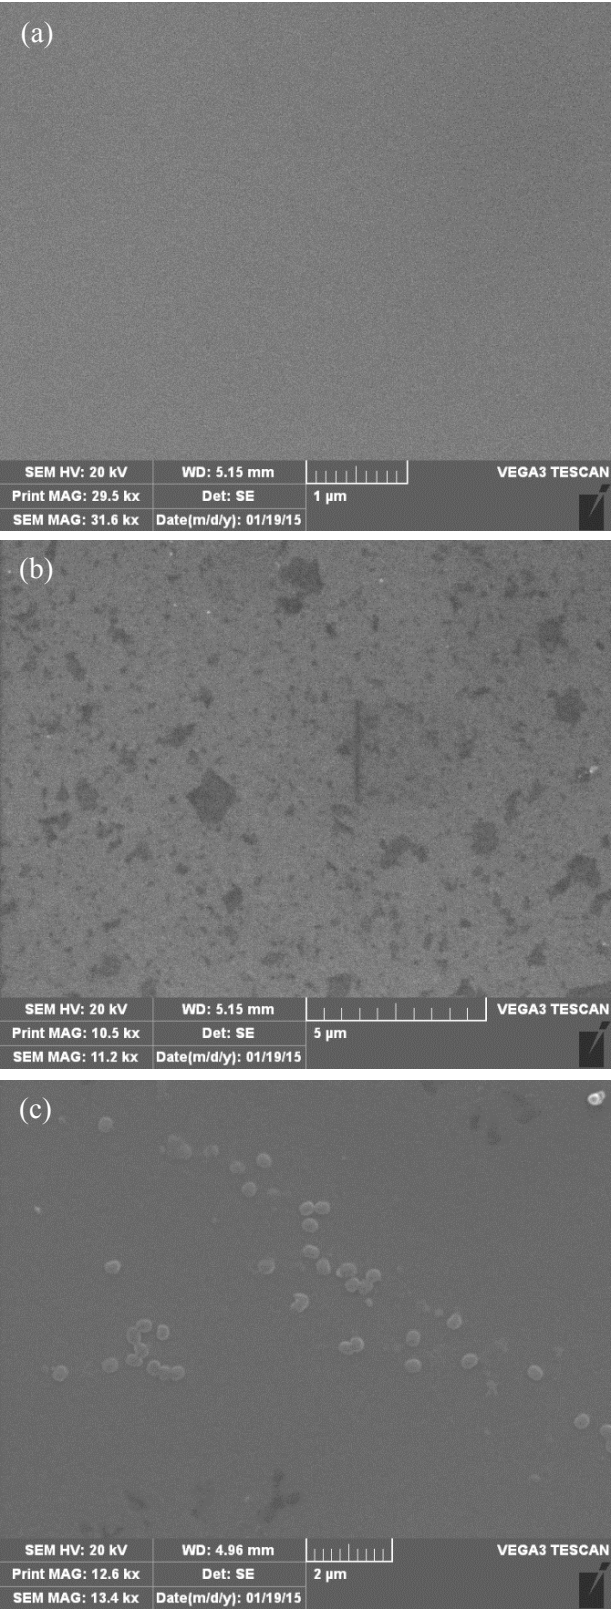

Supplement: c5an01086a1.pdf [file c5an01086a1.pdf]
